# Supplementary material for: Improved HIV-1 neutralization breadth and potency of V2-apex antibodies by in silico design
Source: PubMed Central journal article supplement — Cell Rep. Author manuscript; Available in PMC 2023 Sep 27. (PMC10528384; doi:10.1016/j.celrep.2023.112711), 2023-07-11
Supplement: NIHMS1920480-supplement-2.pdf [file NIHMS1920480-supplement-2.pdf]

# Supplemental Results: Improved HIV-1 Neutralization Breadth and Potency of V2-Apex Antibodies by *In Silico* Design

Graham T. Holt<sup>1,2,†</sup>, Jason Gorman<sup>3,†</sup>, Siyu Wang<sup>2</sup>, Anna U. Lowegard<sup>1,2</sup>, Baoshan Zhang<sup>3</sup>, Tracy Liu<sup>3</sup>, Bob C. Lin<sup>3</sup>, Mark K. Louder<sup>3</sup>, Marcel S. Frenkel<sup>4</sup>, Krisha McKee<sup>3</sup>, Sijy O'Dell<sup>3</sup>, Reda Rawi<sup>3</sup>, Chen-Hsiang Shen<sup>3</sup>, Nicole A. Doria-Rose<sup>3</sup>, Peter D. Kwong<sup>3,\*</sup>, and Bruce R. Donald<sup>1,4,5,6,\*;‡</sup>

<sup>1</sup>*Department of Computer Science, Duke University, Durham NC, USA*

<sup>2</sup>*Program in Computational Biology & Bioinformatics, Duke University, Durham NC, USA*

<sup>3</sup>*Vaccine Research Center, National Institute of Allergy and Infectious Diseases, National Institutes of Health, Bethesda, MD, USA*

<sup>4</sup>*Department of Biochemistry, Duke University, Durham NC, USA*

<sup>5</sup>*Department of Mathematics, Duke University, Durham NC, USA*

<sup>6</sup>*Department of Chemistry, Duke University, Durham NC, USA*

Table SR1: Predicted K\* scores for PGT145 WT and alanine mutants at residues of interest using OSPREY vs. corresponding IC<sub>50</sub> data<sup>1</sup>, related to Results.

| Residue | IC <sub>50</sub> (μg/mL) <sup>1</sup> |       | K* score (log <sub>10</sub> K*) |        | Summary                               |                        |
|---------|---------------------------------------|-------|---------------------------------|--------|---------------------------------------|------------------------|
|         | WT                                    | Ala   | WT                              | Ala    | -Δ log <sub>10</sub> IC <sub>50</sub> | Δ log <sub>10</sub> K* |
| 100d    | 0.010                                 | 2.380 | 3.438                           | 2.483  | -2.377                                | -0.955                 |
| 100e    | 0.010                                 | 9.991 | 7.995                           | 6.278  | -3.000                                | -1.717                 |
| 100l    | 0.010                                 | 0.004 | 15.454                          | 15.155 | 0.398                                 | -0.299                 |
| 100m    | 0.010                                 | >10   | 4.909                           | 3.952  | < -3                                  | -0.957                 |

<sup>1</sup> IC<sub>50</sub> for BG505.Env.C2 pseudovirus.

Table SR2: Upper and lower bounds on the  $K^*$  score and partition functions for PGT145 designs at residues 100e and 100m predicted using OSPREY, related to Results.  $H_\delta$  and  $H_\epsilon$  refer to the  $\delta$  and  $\epsilon$  protonation states of histidine.

| 100e         | 100m         | $\log_{10} K^*$ |        | $\log_{10} Z_C$     |        | $\log_{10} Z_{Ab}$  |        | $\log_{10} Z_{Env}$ |       |
|--------------|--------------|-----------------|--------|---------------------|--------|---------------------|--------|---------------------|-------|
|              |              | UB              | LB     | UB                  | LB     | UB                  | LB     | UB                  | LB    |
| E            | E            | 18.239          | 16.797 | 29.182              | 28.687 | 6.963               | 6.468  | 4.971               | 4.476 |
| E            | D            | 18.202          | 16.802 | 29.035              | 28.540 | 6.862               | 6.367  | 4.961               | 4.466 |
| E            | Y            | 16.646          | 15.292 | 31.986              | 31.491 | 11.369              | 10.874 | 4.961               | 4.466 |
| E            | M            | 16.412          | 15.047 | 30.716 <sup>1</sup> | 30.221 | 10.213 <sup>1</sup> | 9.825  | 4.961 <sup>1</sup>  | 4.479 |
| E            | $H_\epsilon$ | 16.341          | 14.876 | 30.823              | 30.328 | 10.511              | 10.016 | 4.961               | 4.466 |
| D            | E            | 16.336          | 14.908 | 27.329              | 26.834 | 7.028               | 6.533  | 4.955               | 4.460 |
| E            | $H_\delta$   | 16.327          | 14.900 | 30.937 <sup>1</sup> | 30.442 | 10.581 <sup>1</sup> | 10.143 | 4.961 <sup>1</sup>  | 4.468 |
| M            | E            | 16.221          | 14.766 | 30.752 <sup>1</sup> | 30.257 | 10.536 <sup>1</sup> | 10.061 | 4.955 <sup>1</sup>  | 4.470 |
| D            | D            | 16.161          | 14.718 | 27.003              | 26.508 | 6.870               | 6.375  | 4.961               | 4.466 |
| E            | Q            | 16.159          | 14.718 | 29.664              | 29.169 | 9.533               | 9.039  | 4.961               | 4.466 |
| $H_\epsilon$ | E            | 16.148          | 14.671 | 30.558 <sup>1</sup> | 30.063 | 10.430 <sup>1</sup> | 9.941  | 4.962 <sup>1</sup>  | 4.469 |
| M            | D            | 16.088          | 14.608 | 30.438 <sup>1</sup> | 29.943 | 10.372 <sup>1</sup> | 9.881  | 4.963 <sup>1</sup>  | 4.469 |
| $H_\epsilon$ | D            | 16.077          | 14.612 | 30.286 <sup>1</sup> | 29.792 | 10.222 <sup>1</sup> | 9.745  | 4.957 <sup>1</sup>  | 4.465 |
| L            | E            | 15.976          | 14.515 | 30.573              | 30.078 | 10.627              | 10.132 | 4.960               | 4.465 |
| Q            | D            | 15.948          | 14.496 | 29.749 <sup>1</sup> | 29.254 | 9.801 <sup>1</sup>  | 9.331  | 4.957 <sup>1</sup>  | 4.470 |
| Q            | E            | 15.902          | 14.428 | 29.884 <sup>1</sup> | 29.389 | 9.997 <sup>1</sup>  | 9.511  | 4.964 <sup>1</sup>  | 4.471 |
| L            | D            | 15.896          | 14.467 | 30.340              | 29.845 | 10.478              | 9.983  | 4.956               | 4.461 |
| E            | I            | 15.824          | 14.569 | 30.803              | 30.308 | 10.999              | 10.505 | 4.969               | 4.474 |
| E            | T            | 15.689          | 14.222 | 29.558              | 29.063 | 9.897               | 9.403  | 4.961               | 4.466 |
| E            | V            | 15.647          | 14.217 | 29.620              | 29.126 | 10.003              | 9.508  | 4.961               | 4.466 |
| E            | S            | 15.525          | 14.056 | 29.006              | 28.511 | 9.514               | 9.019  | 4.958               | 4.463 |
| E            | C            | 15.510          | 14.096 | 28.813              | 28.318 | 9.332               | 8.837  | 4.961               | 4.466 |
| E            | A            | 15.467          | 14.041 | 28.794              | 28.299 | 9.355               | 8.860  | 4.961               | 4.466 |
| E            | G            | 15.352          | 13.938 | 28.250              | 27.755 | 8.926               | 8.431  | 4.961               | 4.466 |
| $H_\delta$   | E            | 15.264          | 13.854 | 30.129 <sup>1</sup> | 29.634 | 10.821 <sup>1</sup> | 10.398 | 4.960 <sup>1</sup>  | 4.468 |
| $H_\delta$   | D            | 15.247          | 13.818 | 29.935 <sup>1</sup> | 29.441 | 10.660 <sup>1</sup> | 10.220 | 4.962 <sup>1</sup>  | 4.469 |
| T            | E            | 15.090          | 13.609 | 29.368 <sup>1</sup> | 28.873 | 10.307 <sup>1</sup> | 9.812  | 4.958 <sup>1</sup>  | 4.466 |
| T            | D            | 15.075          | 13.596 | 29.173 <sup>1</sup> | 28.678 | 10.128 <sup>1</sup> | 9.635  | 4.954 <sup>1</sup>  | 4.462 |
| V            | D            | 15.032          | 13.594 | 28.938              | 28.443 | 9.935               | 9.440  | 4.961               | 4.466 |
| V            | E            | 15.021          | 13.682 | 29.194              | 28.699 | 10.202              | 9.707  | 4.961               | 4.466 |
| D            | Y            | 14.333          | 12.893 | 29.594              | 29.099 | 11.290              | 10.795 | 4.961               | 4.466 |
| M            | Y            | 14.053          | 12.579 | 32.213 <sup>1</sup> | 31.718 | 14.178 <sup>1</sup> | 13.688 | 4.960 <sup>1</sup>  | 4.471 |
| M            | M            | 14.040          | 12.563 | 31.158 <sup>1</sup> | 30.663 | 13.138 <sup>1</sup> | 12.644 | 4.963 <sup>1</sup>  | 4.474 |
| D            | $H_\epsilon$ | 13.952          | 12.489 | 28.437              | 27.942 | 10.503              | 10.008 | 4.972               | 4.477 |
| D            | M            | 13.918          | 12.448 | 28.261              | 27.766 | 10.368              | 9.873  | 4.965               | 4.470 |
| M            | $H_\epsilon$ | 13.909          | 12.432 | 31.375 <sup>1</sup> | 30.880 | 13.494 <sup>1</sup> | 13.004 | 4.954 <sup>1</sup>  | 4.462 |
| D            | $H_\delta$   | 13.881          | 12.400 | 28.497              | 28.002 | 10.648              | 10.153 | 4.957               | 4.462 |
| $H_\epsilon$ | M            | 13.852          | 12.372 | 30.886 <sup>1</sup> | 30.391 | 13.057 <sup>1</sup> | 12.563 | 4.961 <sup>1</sup>  | 4.470 |
| Q            | Y            | 13.836          | 12.389 | 31.446 <sup>1</sup> | 30.951 | 13.605 <sup>1</sup> | 13.127 | 4.957 <sup>1</sup>  | 4.483 |
| Q            | M            | 13.830          | 12.348 | 30.382 <sup>1</sup> | 29.887 | 12.577 <sup>1</sup> | 12.083 | 4.961 <sup>1</sup>  | 4.469 |
| $H_\epsilon$ | Y            | 13.821          | 12.372 | 31.884 <sup>1</sup> | 31.389 | 14.058 <sup>1</sup> | 13.578 | 4.958 <sup>1</sup>  | 4.485 |

Upper and lower bounds on the  $K^*$  score and partition functions for PGT145 designs at residues 100e and 100m predicted using OSPREY (continued).

| 100e           | 100m           | $\log_{10} K^*$ |        | $\log_{10} Z_C$     |        | $\log_{10} Z_{Ab}$  |        | $\log_{10} Z_{Env}$ |       |
|----------------|----------------|-----------------|--------|---------------------|--------|---------------------|--------|---------------------|-------|
|                |                | UB              | LB     | UB                  | LB     | UB                  | LB     | UB                  | LB    |
| D              | Q              | 13.788          | 12.340 | 27.322              | 26.827 | 9.562               | 9.068  | 4.961               | 4.466 |
| M              | Q              | 13.768          | 12.293 | 30.170 <sup>1</sup> | 29.676 | 12.420 <sup>1</sup> | 11.934 | 4.962 <sup>1</sup>  | 4.469 |
| M              | H <sub>δ</sub> | 13.768          | 12.312 | 31.141 <sup>1</sup> | 30.646 | 13.383 <sup>1</sup> | 12.911 | 4.952 <sup>1</sup>  | 4.462 |
| L <sup>2</sup> | Y <sup>2</sup> | 13.763          | 12.296 | 32.039              | 31.544 | 14.309              | 13.814 | 4.956               | 4.461 |
| L              | M              | 13.732          | 12.275 | 31.009              | 30.514 | 13.306              | 12.811 | 4.961               | 4.466 |
| H <sub>ε</sub> | H <sub>ε</sub> | 13.710          | 12.260 | 31.091 <sup>1</sup> | 30.596 | 13.382 <sup>1</sup> | 12.915 | 4.954 <sup>1</sup>  | 4.466 |
| Q              | H <sub>ε</sub> | 13.688          | 12.245 | 30.610 <sup>1</sup> | 30.115 | 12.915 <sup>1</sup> | 12.442 | 4.955 <sup>1</sup>  | 4.480 |
| H <sub>ε</sub> | Q              | 13.628          | 12.180 | 29.958 <sup>1</sup> | 29.463 | 12.322 <sup>1</sup> | 11.862 | 4.961 <sup>1</sup>  | 4.467 |
| Q              | H <sub>δ</sub> | 13.600          | 12.131 | 30.410 <sup>1</sup> | 29.915 | 12.828 <sup>1</sup> | 12.342 | 4.957 <sup>1</sup>  | 4.469 |
| Q              | Q              | 13.571          | 12.102 | 29.412 <sup>1</sup> | 28.917 | 11.862 <sup>1</sup> | 11.377 | 4.953 <sup>1</sup>  | 4.463 |
| L              | H <sub>ε</sub> | 13.571          | 12.196 | 31.225              | 30.730 | 13.683              | 13.188 | 4.961               | 4.466 |
| H <sub>ε</sub> | H <sub>δ</sub> | 13.546          | 12.076 | 30.835 <sup>1</sup> | 30.341 | 13.304 <sup>1</sup> | 12.823 | 4.960 <sup>1</sup>  | 4.466 |
| L              | Q              | 13.503          | 12.037 | 30.019              | 29.525 | 12.551              | 12.056 | 4.955               | 4.460 |
| L              | H <sub>δ</sub> | 13.503          | 12.024 | 30.964              | 30.469 | 13.492              | 12.997 | 4.959               | 4.464 |
| D              | I              | 13.356          | 11.935 | 28.198              | 27.703 | 10.860              | 10.365 | 4.972               | 4.477 |
| D              | T              | 13.305          | 11.829 | 27.164              | 26.669 | 9.892               | 9.397  | 4.957               | 4.462 |
| M              | T              | 13.295          | 11.815 | 30.043 <sup>1</sup> | 29.548 | 12.772 <sup>1</sup> | 12.280 | 4.961 <sup>1</sup>  | 4.467 |
| H <sub>δ</sub> | M              | 13.204          | 11.777 | 30.605 <sup>1</sup> | 30.110 | 13.378 <sup>1</sup> | 12.941 | 4.956 <sup>1</sup>  | 4.461 |
| M              | I              | 13.177          | 11.728 | 30.990 <sup>1</sup> | 30.495 | 13.807 <sup>1</sup> | 13.347 | 4.960 <sup>1</sup>  | 4.465 |
| H <sub>ε</sub> | T              | 13.142          | 11.666 | 29.815 <sup>1</sup> | 29.320 | 12.693 <sup>1</sup> | 12.201 | 4.961 <sup>1</sup>  | 4.472 |
| D              | V              | 13.132          | 11.699 | 27.154              | 26.659 | 10.051              | 9.556  | 4.961               | 4.466 |
| M              | C              | 13.100          | 11.626 | 29.174 <sup>1</sup> | 28.679 | 12.093 <sup>1</sup> | 11.604 | 4.960 <sup>1</sup>  | 4.469 |
| M              | S              | 13.097          | 11.620 | 29.423 <sup>1</sup> | 28.928 | 12.352 <sup>1</sup> | 11.863 | 4.955 <sup>1</sup>  | 4.464 |
| Q              | T              | 13.084          | 11.614 | 29.303 <sup>1</sup> | 28.808 | 12.235 <sup>1</sup> | 11.751 | 4.959 <sup>1</sup>  | 4.468 |
| H <sub>δ</sub> | Y              | 13.081          | 11.641 | 31.472 <sup>1</sup> | 30.977 | 14.373 <sup>1</sup> | 13.915 | 4.963 <sup>1</sup>  | 4.475 |
| D              | C              | 13.075          | 11.648 | 26.330              | 25.835 | 9.283               | 8.788  | 4.961               | 4.466 |
| H <sub>δ</sub> | H <sub>ε</sub> | 13.054          | 11.586 | 30.820 <sup>1</sup> | 30.325 | 13.779 <sup>1</sup> | 13.300 | 4.960 <sup>1</sup>  | 4.465 |
| D              | S              | 13.040          | 11.588 | 26.588              | 26.093 | 9.573               | 9.078  | 4.965               | 4.470 |
| Q              | I              | 13.026          | 11.620 | 30.246 <sup>1</sup> | 29.751 | 13.175 <sup>1</sup> | 12.757 | 4.956 <sup>1</sup>  | 4.462 |
| L              | T              | 13.018          | 11.541 | 29.892              | 29.397 | 12.905              | 12.410 | 4.958               | 4.464 |
| H <sub>ε</sub> | C              | 12.998          | 11.528 | 28.930 <sup>1</sup> | 28.436 | 11.951 <sup>1</sup> | 11.465 | 4.957 <sup>1</sup>  | 4.467 |
| M              | V              | 12.986          | 11.543 | 29.841 <sup>1</sup> | 29.346 | 12.844 <sup>1</sup> | 12.390 | 4.958 <sup>1</sup>  | 4.464 |
| T              | M              | 12.969          | 11.497 | 29.849 <sup>1</sup> | 29.354 | 12.898 <sup>1</sup> | 12.408 | 4.959 <sup>1</sup>  | 4.472 |
| M              | A              | 12.964          | 11.499 | 29.149 <sup>1</sup> | 28.654 | 12.187 <sup>1</sup> | 11.708 | 4.968 <sup>1</sup>  | 4.477 |
| T              | Y              | 12.955          | 11.476 | 30.892 <sup>1</sup> | 30.397 | 13.958 <sup>1</sup> | 13.466 | 4.962 <sup>1</sup>  | 4.471 |
| E              | R              | 12.953          | 11.495 | 30.116              | 29.622 | 13.182              | 12.687 | 4.972               | 4.477 |
| Q              | C              | 12.951          | 11.474 | 28.451 <sup>1</sup> | 27.956 | 11.527 <sup>1</sup> | 11.038 | 4.955 <sup>1</sup>  | 4.462 |
| H <sub>ε</sub> | S              | 12.945          | 11.464 | 29.188 <sup>1</sup> | 28.693 | 12.276 <sup>1</sup> | 11.782 | 4.954 <sup>1</sup>  | 4.462 |
| D              | A              | 12.934          | 11.566 | 26.339              | 25.844 | 9.434               | 8.939  | 4.961               | 4.466 |
| V              | Y              | 12.925          | 11.468 | 30.651              | 30.157 | 13.755              | 13.260 | 4.961               | 4.466 |
| H <sub>δ</sub> | Q              | 12.888          | 11.412 | 29.553 <sup>1</sup> | 29.058 | 12.687 <sup>1</sup> | 12.198 | 4.960 <sup>1</sup>  | 4.466 |
| L              | I              | 12.885          | 11.475 | 30.824              | 30.329 | 13.964              | 13.469 | 4.965               | 4.470 |
| H <sub>ε</sub> | I              | 12.871          | 11.445 | 30.569 <sup>1</sup> | 30.074 | 13.668 <sup>1</sup> | 13.229 | 4.961 <sup>1</sup>  | 4.469 |

Upper and lower bounds on the  $K^*$  score and partition functions for PGT145 designs at residues 100e and 100m predicted using OSPREY (continued).

| 100e           | 100m           | $\log_{10} K^*$ |        | $\log_{10} Z_C$     |        | $\log_{10} Z_{Ab}$  |        | $\log_{10} Z_{Env}$ |       |
|----------------|----------------|-----------------|--------|---------------------|--------|---------------------|--------|---------------------|-------|
|                |                | UB              | LB     | UB                  | LB     | UB                  | LB     | UB                  | LB    |
| Q              | S              | 12.859          | 11.401 | 28.679 <sup>1</sup> | 28.184 | 11.820 <sup>1</sup> | 11.348 | 4.963 <sup>1</sup>  | 4.472 |
| D              | G              | 12.834          | 11.444 | 25.793              | 25.298 | 8.987               | 8.492  | 4.961               | 4.466 |
| L              | C              | 12.830          | 11.370 | 29.041              | 28.546 | 12.232              | 11.737 | 4.969               | 4.474 |
| L              | S              | 12.824          | 11.351 | 29.274              | 28.779 | 12.478              | 11.984 | 4.961               | 4.466 |
| M              | G              | 12.815          | 11.402 | 28.560 <sup>1</sup> | 28.066 | 11.707 <sup>1</sup> | 11.280 | 4.957 <sup>1</sup>  | 4.465 |
| T              | H <sub>ε</sub> | 12.785          | 11.313 | 30.043 <sup>1</sup> | 29.549 | 13.275 <sup>1</sup> | 12.781 | 4.960 <sup>1</sup>  | 4.477 |
| V              | M              | 12.782          | 11.418 | 29.605              | 29.110 | 12.852              | 12.357 | 4.961               | 4.466 |
| H <sub>δ</sub> | H <sub>δ</sub> | 12.776          | 11.418 | 30.460 <sup>1</sup> | 29.965 | 13.587 <sup>1</sup> | 13.215 | 4.960 <sup>1</sup>  | 4.469 |
| H <sub>ε</sub> | V              | 12.758          | 11.390 | 29.549 <sup>1</sup> | 29.054 | 12.707 <sup>1</sup> | 12.328 | 4.958 <sup>1</sup>  | 4.464 |
| Q              | A              | 12.756          | 11.308 | 28.400 <sup>1</sup> | 27.905 | 11.638 <sup>1</sup> | 11.167 | 4.958 <sup>1</sup>  | 4.477 |
| Q              | V              | 12.756          | 11.340 | 29.097 <sup>1</sup> | 28.602 | 12.304 <sup>1</sup> | 11.860 | 4.958 <sup>1</sup>  | 4.481 |
| V              | H <sub>ε</sub> | 12.750          | 11.299 | 29.806              | 29.311 | 13.089              | 12.595 | 4.956               | 4.461 |
| H <sub>ε</sub> | A              | 12.673          | 11.362 | 28.899 <sup>1</sup> | 28.405 | 12.089 <sup>1</sup> | 11.762 | 4.954 <sup>1</sup>  | 4.464 |
| L              | V              | 12.657          | 11.286 | 29.669              | 29.174 | 13.034              | 12.540 | 4.967               | 4.472 |
| T              | Q              | 12.634          | 11.162 | 28.834 <sup>1</sup> | 28.340 | 12.219 <sup>1</sup> | 11.728 | 4.959 <sup>1</sup>  | 4.472 |
| T              | H <sub>δ</sub> | 12.623          | 11.176 | 29.808 <sup>1</sup> | 29.313 | 13.182 <sup>1</sup> | 12.707 | 4.954 <sup>1</sup>  | 4.477 |
| L              | A              | 12.584          | 11.262 | 28.996              | 28.501 | 12.447              | 11.952 | 4.955               | 4.460 |
| V              | H <sub>δ</sub> | 12.582          | 11.158 | 29.556              | 29.061 | 13.002              | 12.507 | 4.961               | 4.466 |
| Q              | G              | 12.581          | 11.180 | 27.815 <sup>1</sup> | 27.320 | 11.180 <sup>1</sup> | 10.761 | 4.960 <sup>1</sup>  | 4.472 |
| V              | Q              | 12.549          | 11.175 | 28.609              | 28.114 | 12.086              | 11.591 | 4.964               | 4.469 |
| L              | G              | 12.514          | 11.110 | 28.402              | 27.907 | 11.916              | 11.421 | 4.961               | 4.466 |
| H <sub>ε</sub> | G              | 12.473          | 11.001 | 28.303 <sup>1</sup> | 27.809 | 11.846 <sup>1</sup> | 11.362 | 4.962 <sup>1</sup>  | 4.469 |
| H <sub>δ</sub> | T              | 12.406          | 10.939 | 29.446 <sup>1</sup> | 28.951 | 13.052 <sup>1</sup> | 12.573 | 4.961 <sup>1</sup>  | 4.467 |
| H <sub>δ</sub> | I              | 12.405          | 10.934 | 30.324 <sup>1</sup> | 29.829 | 13.942 <sup>1</sup> | 13.454 | 4.953 <sup>1</sup>  | 4.466 |
| H <sub>δ</sub> | S              | 12.223          | 10.742 | 28.828 <sup>1</sup> | 28.333 | 12.633 <sup>1</sup> | 12.140 | 4.959 <sup>1</sup>  | 4.465 |
| H <sub>δ</sub> | C              | 12.208          | 10.735 | 28.573 <sup>1</sup> | 28.078 | 12.386 <sup>1</sup> | 11.897 | 4.957 <sup>1</sup>  | 4.468 |
| T              | T              | 12.158          | 10.682 | 28.704 <sup>1</sup> | 28.209 | 12.570 <sup>1</sup> | 12.077 | 4.957 <sup>1</sup>  | 4.469 |
| V              | T              | 12.128          | 10.664 | 28.467              | 27.972 | 12.368              | 11.873 | 4.961               | 4.466 |
| T              | I              | 12.119          | 10.644 | 29.643 <sup>1</sup> | 29.148 | 13.543 <sup>1</sup> | 13.056 | 4.961 <sup>1</sup>  | 4.468 |
| H <sub>δ</sub> | G              | 12.047          | 10.568 | 28.103 <sup>1</sup> | 27.608 | 12.079 <sup>1</sup> | 11.590 | 4.960 <sup>1</sup>  | 4.466 |
| H <sub>δ</sub> | A              | 12.023          | 10.651 | 28.534 <sup>1</sup> | 28.039 | 12.436 <sup>1</sup> | 12.053 | 4.952 <sup>1</sup>  | 4.458 |
| T              | C              | 11.968          | 10.501 | 27.838 <sup>1</sup> | 27.344 | 11.882 <sup>1</sup> | 11.404 | 4.961 <sup>1</sup>  | 4.467 |
| T              | S              | 11.953          | 10.471 | 28.090 <sup>1</sup> | 27.595 | 12.167 <sup>1</sup> | 11.674 | 4.957 <sup>1</sup>  | 4.463 |
| V              | S              | 11.926          | 10.450 | 27.840              | 27.345 | 11.942              | 11.447 | 4.961               | 4.466 |
| V              | I              | 11.921          | 10.641 | 29.419              | 28.924 | 13.527              | 13.033 | 4.961               | 4.466 |
| V              | C              | 11.897          | 10.467 | 27.575              | 27.080 | 11.703              | 11.208 | 4.964               | 4.469 |
| T              | V              | 11.857          | 10.408 | 28.513 <sup>1</sup> | 28.018 | 12.649 <sup>1</sup> | 12.188 | 4.962 <sup>1</sup>  | 4.468 |
| T              | A              | 11.835          | 10.372 | 27.819 <sup>1</sup> | 27.324 | 12.006 <sup>1</sup> | 11.513 | 4.946 <sup>1</sup>  | 4.471 |
| H <sub>δ</sub> | V              | 11.835          | 10.536 | 29.093 <sup>1</sup> | 28.598 | 13.100 <sup>1</sup> | 12.789 | 4.962 <sup>1</sup>  | 4.469 |
| M              | R              | 11.784          | 10.304 | 29.923 <sup>1</sup> | 29.428 | 14.160 <sup>1</sup> | 13.668 | 4.964 <sup>1</sup>  | 4.471 |
| V              | V              | 11.739          | 10.375 | 28.272              | 27.777 | 12.568              | 12.073 | 4.955               | 4.460 |
| T              | G              | 11.704          | 10.248 | 27.234 <sup>1</sup> | 26.739 | 11.537 <sup>1</sup> | 11.046 | 4.954 <sup>1</sup>  | 4.484 |
| V              | A              | 11.692          | 10.343 | 27.564              | 27.069 | 11.901              | 11.406 | 4.961               | 4.466 |

Upper and lower bounds on the  $K^*$  score and partition functions for PGT145 designs at residues 100e and 100m predicted using OSPREY (continued).

| 100e                               | 100m | $\log_{10} K^*$ |        | $\log_{10} Z_C$     |        | $\log_{10} Z_{Ab}$  |        | $\log_{10} Z_{Env}$ |       |
|------------------------------------|------|-----------------|--------|---------------------|--------|---------------------|--------|---------------------|-------|
|                                    |      | UB              | LB     | UB                  | LB     | UB                  | LB     | UB                  | LB    |
| Q                                  | R    | 11.579          | 10.104 | 29.258 <sup>1</sup> | 28.763 | 13.705 <sup>1</sup> | 13.216 | 4.954 <sup>1</sup>  | 4.463 |
| L                                  | R    | 11.473          | 10.010 | 29.745              | 29.250 | 14.301              | 13.806 | 4.961               | 4.466 |
| V                                  | G    | 11.456          | 10.215 | 26.956              | 26.461 | 11.533              | 11.038 | 4.957               | 4.462 |
| H <sub><math>\epsilon</math></sub> | R    | 11.434          | 9.963  | 29.676 <sup>1</sup> | 29.181 | 14.263 <sup>1</sup> | 13.780 | 4.956 <sup>1</sup>  | 4.463 |
| H <sub><math>\delta</math></sub>   | R    | 10.948          | 9.473  | 29.260 <sup>1</sup> | 28.765 | 14.333 <sup>1</sup> | 13.848 | 4.959 <sup>1</sup>  | 4.464 |
| V                                  | R    | 10.608          | 9.132  | 28.326              | 27.832 | 13.748              | 13.253 | 4.961               | 4.466 |
| T                                  | R    | 10.593          | 9.118  | 28.603 <sup>1</sup> | 28.109 | 14.035 <sup>1</sup> | 13.540 | 4.956 <sup>1</sup>  | 4.470 |
| D                                  | R    | 10.578          | 9.151  | 27.473              | 26.979 | 12.914              | 12.419 | 4.972               | 4.477 |

<sup>1</sup> Upper bounds computed using lower bound and  $\epsilon = 0.68$ .

<sup>2</sup> Wild-type amino-acid.

Table SR3: Root mean-squared deviation between existing structures of PGT145, related to Results.

| PDB ID            | RMSD ( $\text{\AA}$ ) <sup>1,2</sup> |            |            |            |            |            |
|-------------------|--------------------------------------|------------|------------|------------|------------|------------|
|                   | 8FLW <sup>3</sup>                    | 6NIJ       | 58VL       | 8DVD       | 3U1S       | 5U1F       |
| 8FLW <sup>3</sup> | 0.00 (140)                           |            |            |            |            |            |
| 6NIJ              | 1.95 (140)                           | 0.00 (140) |            |            |            |            |
| 5V8L              | 1.32 (140)                           | 1.69 (140) | 0.00 (140) |            |            |            |
| 8DVD              | 1.40 (140)                           | 1.86 (140) | 1.03 (140) | 0.00 (140) |            |            |
| 3U1S              | 1.35 (140)                           | 1.66 (140) | 0.76 (140) | 0.76 (140) | 0.00 (240) |            |
| 5U1F              | 1.37 (138)                           | 1.69 (138) | 0.80 (138) | 0.84 (138) | 1.16 (235) | 0.00 (235) |

<sup>1</sup> RMSD computed for all resolved PGT145 antibody heavy chain  $C_\alpha$  atoms using the PyMOL `align` command with the `cycles=0` option.

<sup>2</sup> Numbers in parentheses represent the number of atoms included in the RMSD calculation.

<sup>3</sup> Cryo-EM structure of PGT145 DU303.

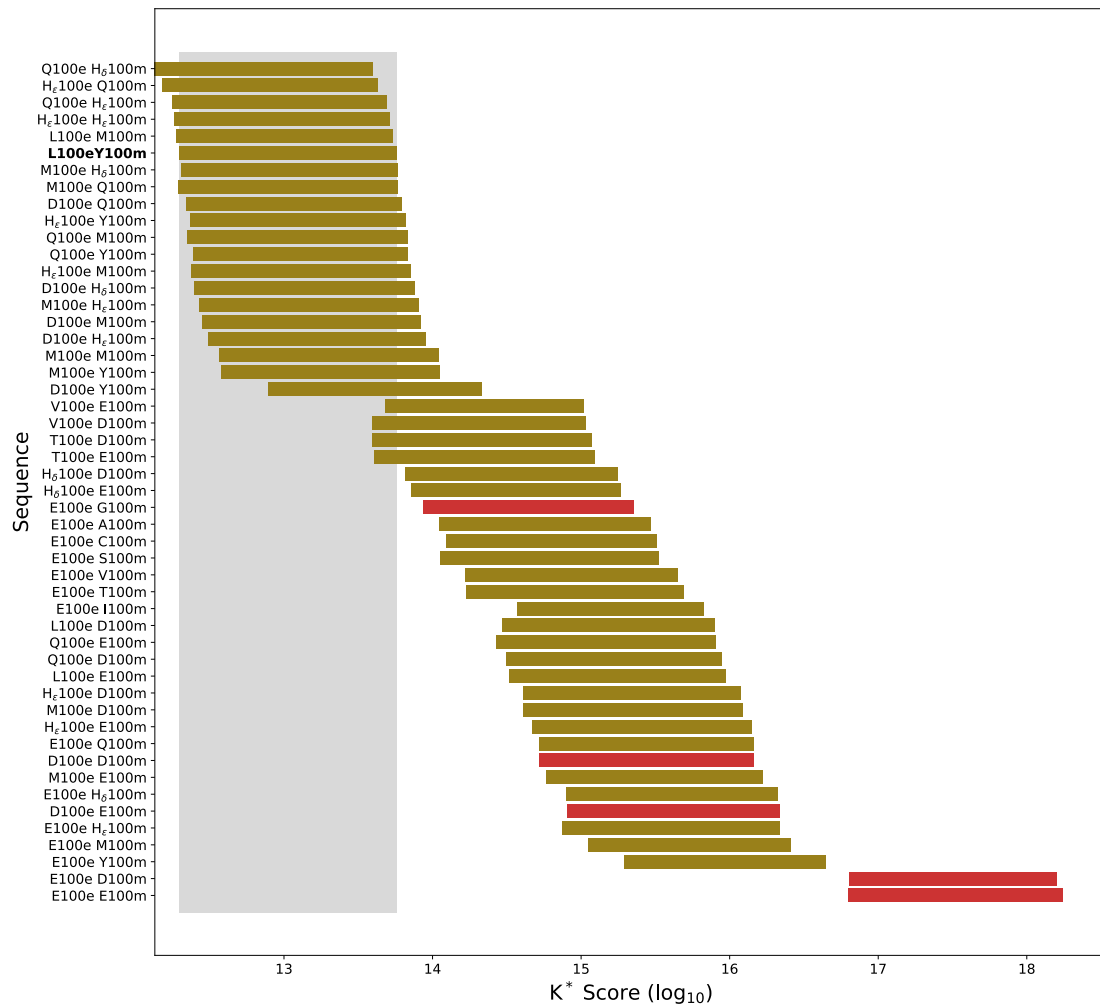

**Figure SR1: K\* scores for a double-mutation design of PGT145 at residues 100e and 100m, related to Results.** Bounds on the K\* score for single mutations predicted using OSPREY are shown as horizontal bars. Pictured results are limited to the top 50 design predictions. Designs for which the unbound antibody is predicted to be more stable, approximately equally-stable, or less stable than wild-type are indicated by green, tan, or red coloring, respectively. Relative stability was estimated using the lower-bound on the partition-function value for the unbound antibody state. Wild-type antibody residue labeled in bold. The bounds on the K\* score for the wild-type design are indicated by the gray, shaded box.

Table SR4: Root mean-squared deviation between existing structures of PG9, related to Results.

| PDB ID            | RMSD (Å) <sup>1,2</sup> |                   |            |            |            |            |            |            |
|-------------------|-------------------------|-------------------|------------|------------|------------|------------|------------|------------|
|                   | 8FK5 <sup>3</sup>       | 8FL1 <sup>4</sup> | 7T77       | 7T76       | 3U4E       | 3U2S       | 4YAQ       | 5VJ6       |
| 8FK5 <sup>3</sup> | 0.00 (136)              |                   |            |            |            |            |            |            |
| 8FL1 <sup>4</sup> | 0.57 (136)              | 0.00 (136)        |            |            |            |            |            |            |
| 7T77              | 0.61 (133)              | 0.85 (133)        | 0.00 (133) |            |            |            |            |            |
| 7T76              | 0.81 (135)              | 1.00 (135)        | 0.61 (133) | 0.00 (136) |            |            |            |            |
| 3U4E              | 0.62 (136)              | 0.83 (136)        | 0.62 (133) | 0.84 (135) | 0.00 (239) |            |            |            |
| 3U2S              | 0.62 (136)              | 0.87 (136)        | 0.44 (133) | 0.77 (135) | 3.38 (230) | 0.00 (230) |            |            |
| 4YAQ              | 0.69 (136)              | 0.92 (136)        | 0.53 (133) | 0.85 (135) | 5.14 (239) | 1.94 (230) | 0.00 (239) |            |
| 5VJ6              | 2.18 (135)              | 2.34 (135)        | 2.06 (133) | 2.02 (135) | 2.35 (229) | 3.59 (229) | 5.16 (229) | 0.00 (229) |

<sup>1</sup> RMSD computed for all resolved PG9 antibody heavy chain C<sub>α</sub> atoms using the PyMOL `align` command with the `cycles=0` option.

<sup>2</sup> Numbers in parentheses represent the number of atoms included in the RMSD calculation.

<sup>3</sup> Cryo-EM structure of PG9RSH N(100f)Y.

<sup>4</sup> Cryo-EM structure of DU025.

Table SR6: Flexible residues for designs PGT145 with AMC011 or SIVmac239, related to Results.

| PDB ID | Name                      | Target     | Mutable res  | Flexible res                               |
|--------|---------------------------|------------|--------------|--------------------------------------------|
| 6NIJ   | PGT145:Env<br>(AMC011)    | 100d, 100l | H100D, H100L | H100A, H100N,<br>A168, A169,<br>C166, C167 |
| 8DVD   | PGT145:Env<br>(SIVmac239) | 100d, 100l | H100D, H100L | H100A, H100N,<br>E168, E169,<br>G166, G167 |

Table SR5: Predicted  $K^*$  scores for PGT145 WT and variants using OSPREY vs. corresponding small-panel neutralization data, related to Results. In general,  $K^*$  scores do not correlate quantitatively with binding affinity<sup>2</sup> except in some cases in which multiple high-resolution structures are used<sup>3</sup>. For these reasons, in this study, the  $K^*$  scores were used as a filter, to select a small number (10) of candidate PGT145 designs (out of thousands of possible sequences) for experimental testing, with the hypothesis that some would increase breadth or potency as predicted.

| Ab Variant | $IC_{50}$ ( $\mu\text{g}/\text{mL}$ ) <sup>1</sup> |         | $K^*$ score ( $\log_{10}K^*$ ) <sup>2</sup> |         | Summary                   |                      |
|------------|----------------------------------------------------|---------|---------------------------------------------|---------|---------------------------|----------------------|
|            | WT                                                 | Variant | WT                                          | Variant | $-\Delta\log_{10}IC_{50}$ | $\Delta\log_{10}K^*$ |
| F(100d)E   | 0.080                                              | 0.698   | 5.288                                       | 6.911   | -0.094                    | 1.623                |
| L(100e)E   | 0.080                                              | >50     | 13.763                                      | 16.646  | < -2.80                   | 2.883                |
| N(100l)D   | 0.080                                              | 0.017   | 5.288                                       | 8.891   | 0.398                     | 3.603                |
| Y(100m)E   | 0.080                                              | >50     | 13.763                                      | 15.976  | < -2.80                   | 2.213                |

<sup>1</sup>  $IC_{50}$  for BG505.Env.C2 pseudovirus. Geometric mean over several assays reported for wild-type value.

<sup>2</sup> Upper bound on the  $K^*$  score reported.

Table SR7: Upper and lower bounds on the  $K^*$  score and partition functions for designs of PGT145 in complex with AMC011 at residues 100d and 100l predicted using OSPREY, related to Results.  $H_\delta$  and  $H_\epsilon$  refer to the  $\delta$  and  $\epsilon$  protonation states of histidine.

| 100d       | 100l         | $\log_{10}K^*$ |       | $\log_{10}Z_C$ |        | $\log_{10}Z_{Ab}$ |        | $\log_{10}Z_{Env}$ |        |
|------------|--------------|----------------|-------|----------------|--------|-------------------|--------|--------------------|--------|
|            |              | UB             | LB    | UB             | LB     | UB                | LB     | UB                 | LB     |
| W          | D            | 9.845          | 8.816 | 46.390         | 46.149 | 20.009            | 19.527 | 17.324             | 17.018 |
| Y          | D            | 9.355          | 8.493 | 46.396         | 46.151 | 20.334            | 20.023 | 17.324             | 17.018 |
| F          | D            | 9.325          | 8.506 | 45.941         | 45.731 | 19.901            | 19.598 | 17.324             | 17.018 |
| W          | Y            | 9.105          | 8.096 | 46.037         | 45.849 | 20.429            | 19.914 | 17.324             | 17.018 |
| $H_\delta$ | Y            | 8.857          | 7.749 | 44.974         | 44.759 | 19.686            | 19.099 | 17.324             | 17.018 |
| D          | $H_\epsilon$ | 8.798          | 7.841 | 41.889         | 41.644 | 16.479            | 16.073 | 17.324             | 17.018 |
| W          | T            | 8.794          | 7.720 | 48.532         | 48.321 | 23.277            | 22.721 | 17.324             | 17.018 |
| W          | $H_\epsilon$ | 8.762          | 7.936 | 48.123         | 47.939 | 22.679            | 22.342 | 17.324             | 17.018 |
| F          | $H_\epsilon$ | 8.737          | 7.767 | 47.691         | 47.491 | 22.400            | 21.936 | 17.324             | 17.018 |



Upper and lower bounds on the  $K^*$  score and partition functions for designs of PGT145 in complex with AMC011 at residues 100d and 100l predicted using OSPREY (continued).

| 100d            | 100l            | $\log_{10}K^*$ |       | $\log_{10}Z_C$ |        | $\log_{10}Z_{Ab}$ |        | $\log_{10}Z_{Env}$ |        |
|-----------------|-----------------|----------------|-------|----------------|--------|-------------------|--------|--------------------|--------|
|                 |                 | UB             | LB    | UB             | LB     | UB                | LB     | UB                 | LB     |
| Y               | Y               | 8.681          | 7.796 | 46.114         | 45.908 | 20.789            | 20.415 | 17.324             | 17.018 |
| W               | Q               | 8.628          | 7.512 | 44.841         | 44.596 | 19.760            | 19.194 | 17.324             | 17.018 |
| H $_{\delta}$   | H $_{\epsilon}$ | 8.587          | 7.498 | 47.009         | 46.765 | 21.944            | 21.404 | 17.324             | 17.018 |
| W               | S               | 8.551          | 7.389 | 48.141         | 47.898 | 23.185            | 22.572 | 17.324             | 17.018 |
| F               | Y               | 8.530          | 7.681 | 45.545         | 45.307 | 20.302            | 19.997 | 17.324             | 17.018 |
| D               | M               | 8.511          | 7.389 | 43.109         | 42.863 | 18.151            | 17.580 | 17.324             | 17.018 |
| W               | M               | 8.417          | 7.427 | 49.377         | 49.139 | 24.388            | 23.942 | 17.324             | 17.018 |
| Y               | H $_{\epsilon}$ | 8.414          | 7.547 | 48.161         | 47.922 | 23.051            | 22.729 | 17.324             | 17.018 |
| D               | N               | 8.405          | 7.380 | 42.413         | 42.178 | 17.475            | 16.991 | 17.324             | 17.018 |
| W               | N               | 8.353          | 7.418 | 48.753         | 48.515 | 23.774            | 23.382 | 17.324             | 17.018 |
| H $_{\epsilon}$ | H $_{\epsilon}$ | 8.253          | 7.353 | 46.331         | 46.092 | 21.415            | 21.060 | 17.324             | 17.018 |
| F <sup>1</sup>  | N <sup>1</sup>  | 7.941          | 7.088 | 48.420         | 48.174 | 23.762            | 23.461 | 17.324             | 17.018 |

<sup>1</sup> Wild-type amino-acid.

Table SR8: Upper and lower bounds on the  $K^*$  score and partition functions for designs of PGT145 in complex with SIVmac239 at residues 100d and 100l predicted using OSPREY, related to Results. H $_{\delta}$  and H $_{\epsilon}$  refer to the  $\delta$  and  $\epsilon$  protonation states of histidine.

| 100d            | 100l            | $\log_{10}K^*$ |        | $\log_{10}Z_C$ |        | $\log_{10}Z_{Ab}$ |        | $\log_{10}Z_{Env}$ |        |
|-----------------|-----------------|----------------|--------|----------------|--------|-------------------|--------|--------------------|--------|
|                 |                 | UB             | LB     | UB             | LB     | UB                | LB     | UB                 | LB     |
| H $_{\delta}$   | E               | 12.040         | 10.673 | 44.537         | 44.292 | 21.204            | 20.585 | 12.415             | 11.912 |
| F               | E               | 11.704         | 10.418 | 45.280         | 45.034 | 22.202            | 21.664 | 12.415             | 11.912 |
| E               | M               | 11.685         | 10.329 | 46.220         | 45.975 | 23.232            | 22.624 | 12.415             | 11.912 |
| H $_{\epsilon}$ | E               | 11.504         | 10.172 | 45.117         | 44.872 | 22.285            | 21.701 | 12.415             | 11.912 |
| E               | H $_{\epsilon}$ | 11.479         | 10.210 | 46.581         | 46.336 | 23.712            | 23.190 | 12.415             | 11.912 |
| E               | Q               | 11.418         | 10.080 | 45.046         | 44.801 | 22.306            | 21.716 | 12.415             | 11.912 |
| E               | V               | 11.311         | 9.959  | 44.408         | 44.163 | 21.789            | 21.185 | 12.415             | 11.912 |
| E               | T               | 11.250         | 9.890  | 44.781         | 44.536 | 22.232            | 21.620 | 12.415             | 11.912 |
| E               | N               | 11.243         | 9.938  | 45.009         | 44.764 | 22.411            | 21.855 | 12.415             | 11.912 |
| E               | S               | 11.153         | 9.790  | 44.176         | 43.931 | 21.726            | 21.112 | 12.415             | 11.912 |
| E               | C               | 11.099         | 9.829  | 44.518         | 44.273 | 22.029            | 21.508 | 12.415             | 11.912 |
| H $_{\delta}$   | M               | 10.970         | 9.620  | 47.177         | 46.932 | 24.897            | 24.296 | 12.415             | 11.912 |
| F               | M               | 10.946         | 9.635  | 48.032         | 47.786 | 25.737            | 25.174 | 12.415             | 11.912 |
| F               | H $_{\epsilon}$ | 10.915         | 9.600  | 49.488         | 49.242 | 27.228            | 26.660 | 12.415             | 11.912 |
| W               | H $_{\epsilon}$ | 10.881         | 9.573  | 47.387         | 47.141 | 25.153            | 24.593 | 12.415             | 11.912 |
| W               | N               | 10.802         | 9.447  | 45.429         | 45.184 | 23.323            | 22.716 | 12.415             | 11.912 |
| H $_{\delta}$   | H $_{\epsilon}$ | 10.773         | 9.449  | 48.280         | 48.035 | 26.171            | 25.596 | 12.415             | 11.912 |
| Y               | R               | 10.761         | 9.414  | 47.990         | 47.745 | 25.916            | 25.318 | 12.415             | 11.912 |
| H $_{\delta}$   | Q               | 10.639         | 9.286  | 46.724         | 46.479 | 24.778            | 24.173 | 12.415             | 11.912 |
| F               | Q               | 10.539         | 9.289  | 47.731         | 47.486 | 25.782            | 25.281 | 12.415             | 11.912 |

Upper and lower bounds on the  $K^*$  score and partition functions for designs of PGT145 in complex with SIVmac239 at residues 100d and 100l predicted using OSPREY (continued).

| 100d           | 100l           | $\log_{10} K^*$ |       | $\log_{10} Z_C$ |        | $\log_{10} Z_{Ab}$ |        | $\log_{10} Z_{Env}$ |        |
|----------------|----------------|-----------------|-------|-----------------|--------|--------------------|--------|---------------------|--------|
|                |                | UB              | LB    | UB              | LB     | UB                 | LB     | UB                  | LB     |
| F <sup>1</sup> | N <sup>1</sup> | 10.288          | 9.235 | 47.248          | 47.003 | 25.353             | 25.048 | 12.415              | 11.912 |

<sup>1</sup> Wild-type amino-acid.

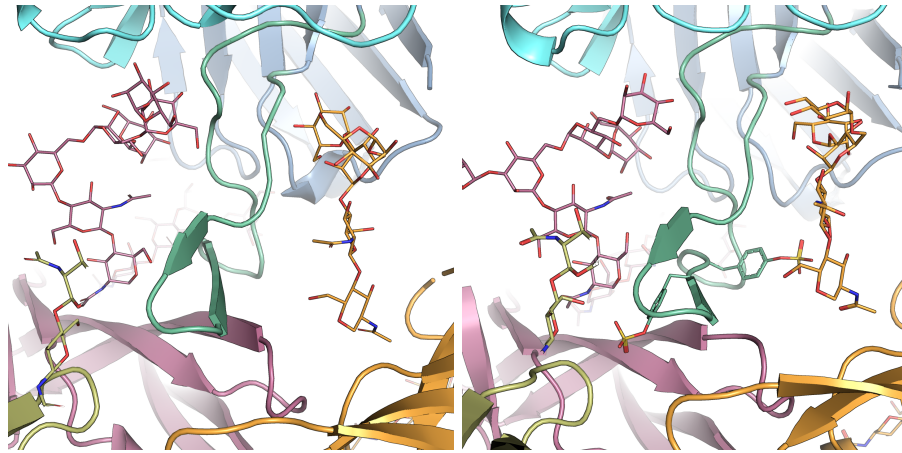

(A) The CDRH3 loop for PG9RSH N(100f)Y (B) The CDRH3 loop for DU025 exhibits a twisted conformation.

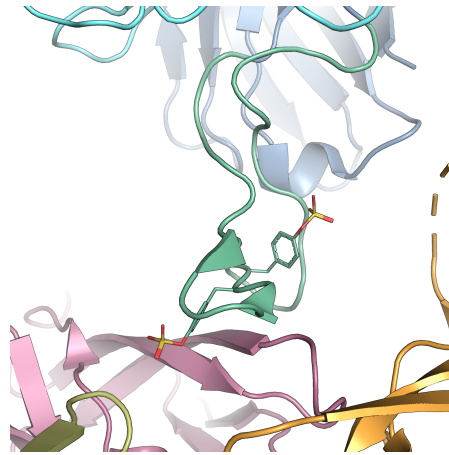

(C) The CDRH3 loop for PG9 (PDB ID: 5VJ6) exhibits an untwisted conformation.

**Figure SR2: The CDHR3 loop conformation differs between PG9RSH variants and PG9, related to Results.** Backbone shown in ribbon representation with glycans and sulfated tyrosines shown as lines with Env subunits colored with warm colors, antibody in cool colors, and antibody CDRH3 loops (residues 95-102) shown in green. A pronounced twist in the CDRH3 loop of PG9RSH variants N(100f)Y (A) and DU025 (B) can be seen, contrasted with the untwisted conformation in PG9 (C). As a result, residues 100i - 100n are displaced by up to 3.6 Å.

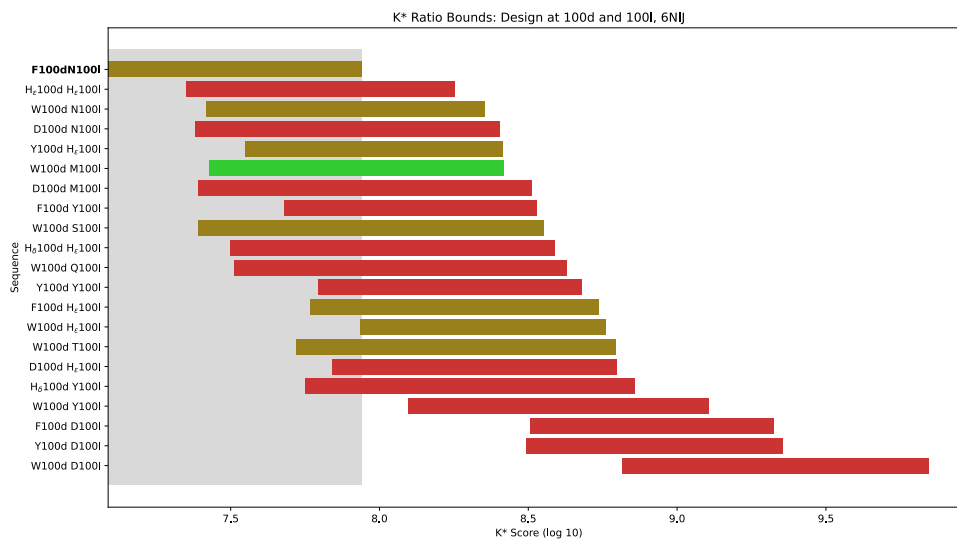

**Figure SR3: K\* scores for a double-mutation design of PGT145 in complex with AMC011 at residues 100d and 100l, related to Results.** Bounds on the K\* score for single mutations predicted using OSPREY are shown as horizontal bars. Pictured results are limited to the top 20 design predictions. Designs for which the unbound antibody is predicted to be more stable, approximately equally-stable, or less stable than wild-type are indicated by green, tan, or red coloring, respectively. Relative stability was estimated using the lower-bound on the partition-function value for the unbound antibody state. Wild-type antibody residue labeled in bold. The bounds on the K\* score for the wild-type design are indicated by the gray, shaded box.

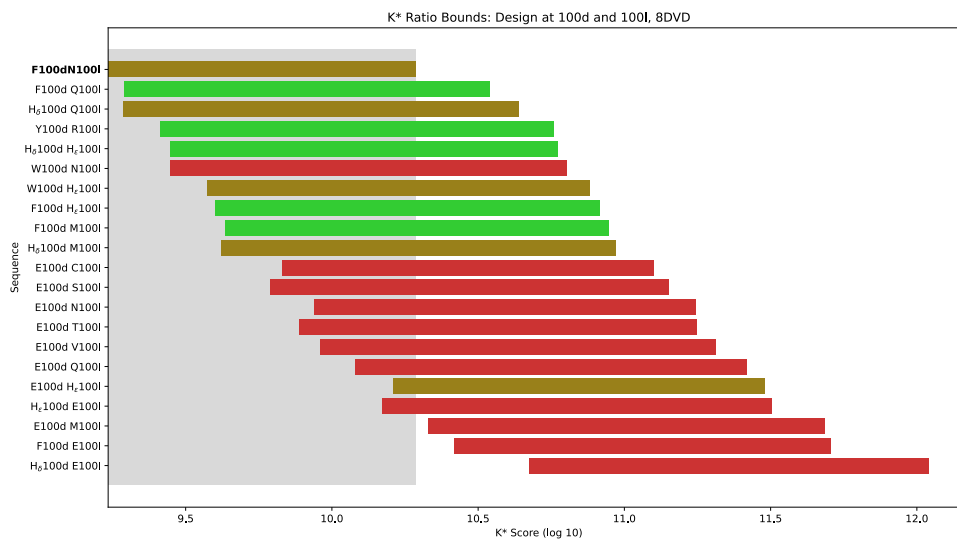

**Figure SR4: K\* scores for a double-mutation design of PGT145 in complex with SIVmac239 at residues 100d and 100l, related to Results.** Bounds on the K\* score for single mutations predicted using OSPREY are shown as horizontal bars. Pictured results are limited to the top 20 design predictions. Designs for which the unbound antibody is predicted to be more stable, approximately equally-stable, or less stable than wild-type are indicated by green, tan, or red coloring, respectively. Relative stability was estimated using the lower-bound on the partition-function value for the unbound antibody state. Wild-type antibody residue labeled in bold. The bounds on the K\* score for the wild-type design are indicated by the gray, shaded box.

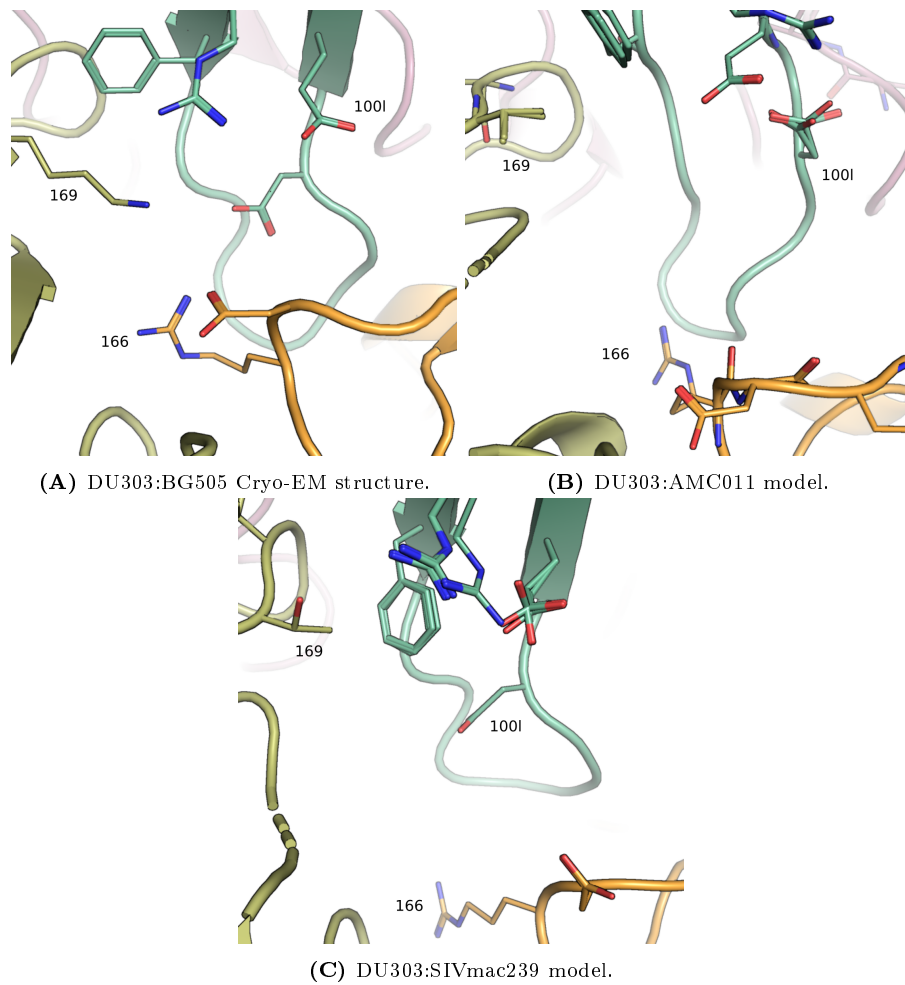

**Figure SR5: Conservative homology models predict that the N(100I)D mutation will not create intermolecular contacts with AMC011 or SIVmac239, related to Results.** Backbone shown in ribbon representation with flexible residues shown as lines with Env subunits colored with warm colors and antibody CDRH3 loops (residues 95-102) shown in green. Models predict that antibody residue D(100I) does not interact with position 169 due to residue substitution, and does not interact with residue 166 due to CDRH3 loop and V2 loop conformational shifts.

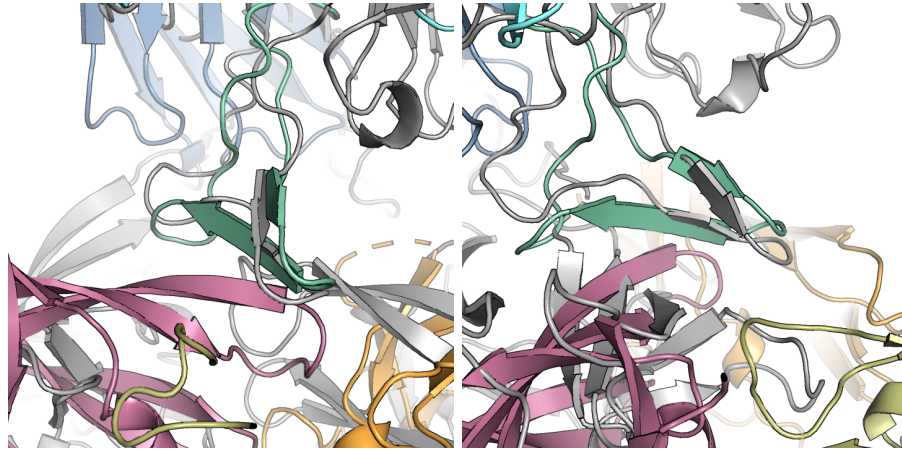

(A) AF2 models of DU011 bound to JRFL.JB Env (B) AF2 models of DU011 bound to ZM233.6 Env

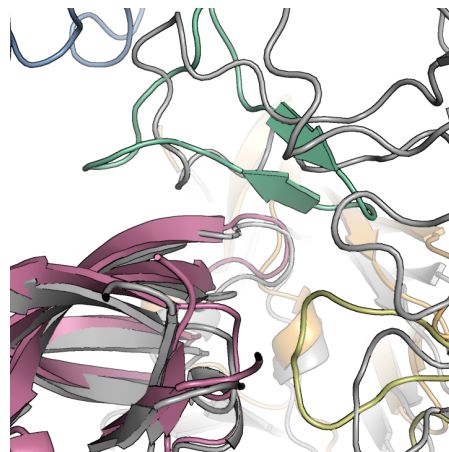

(C) AF2 models of DU025 bound to JRFL.JB Env

**Figure SR6: Alphafold Multimer predicted interactions between antibodies and Env are incorrect, related to Results.** Backbone shown in ribbon representation. The Cryo-EM structures are shown in color, with Env subunits in warm colors and antibody in cool colors, and antibody CDRH3 loops (residues 95-102) shown in green. Alphafold Multimer models are shown in gray. Interestingly, in some cases Alphafold Multimer does predict that PG9 binds to the Env apex, but incorrectly predicts A) an antiparallel  $\beta$ -strand interaction, B) a “cross strand” interaction, or C) an interaction in which the antibody lies parallel to the Env apex plane. In most cases, including all predicted models with BG505 Env and predicted models of DU025 in complex with TRO.11, physically reasonable predicted structures did not place the antibody at the Env apex (not pictured).

## SR1 Extended design results

### SR1.1 Validation of design pipeline on published experimental data

To validate our computational protein design methods on the antibody structure input models we first attempted to compare point-mutation designs to published experimental data. We performed four single-residue designs on the PGT145 CDRH3 loop (Residues 100d, 100e, 100l, and 100m) using OSPREY and computed  $K^*$  scores for both the wild-type amino-acid and substitution with alanine. We compared the resulting change in  $K^*$  score with previously determined  $IC_{50}$  data from alanine-scanning of PGT145<sup>1</sup>. The changes in the  $\log_{10}K^*$  scores qualitatively recapitulated trends seen in the experimental data (See Table SR1).

### SR1.2 Additional designs for PGT145

We performed double-mutation designs of PGT145 at residues L(100e) and Y(100m) and predicted mutations to improve binding (Figure SR1 and Table SR2). The  $\log_{10}K^*$  score for the wild-type sequence was bounded by the interval [12.3, 13.8] and the  $\log_{10}Z_{Ab}$  was bounded by the interval [13.8, 14.3]. Sequences for which the lower-bound on  $\log_{10}Z_{Ab}$  was less than 9.70 were excluded from consideration. Combinations of L(100e)E, L(100e)M, and L(100e)H with Y(100m), Y(100m)M, Y(100m)H, and Y(100m)E were predicted to improve binding without a large reduction in antibody stability.

### SR1.3 Additional designs for PG9RSH

Designs of PG9RSH based on a high-resolution, monomeric input model of PG9 binding to the gp120 V1 and V2 loops (PDB ID: 3U2S) returned mutations at various residues predicted to improve binding. A three-residue design of residues R(100b), N(100c), and Y(100e) suggested that positions 100b and 100e are not amenable to mutation, while position 100c exhibits many mutations that are predicted to be slightly favorable, including Met, His, Arg, and Lys. Most mutations are predicted to result in only a slight increase in  $\log_{10}K^*$  score over the wild-type ( $\log_{10}K^* = 13.0$ )

## SR2 Small-panel neutralization results

We assayed selected designs for neutralization on a small panel of 10 pseudovirus strains. Designs that performed well on these small assays were selected for large-panel (208 pseudoviruses) neutralization assays. Variants were selected for further characterization based on the number of pseudoviruses neutralized with an  $IC_{80} \leq 50\mu\text{g/mL}$ , the median  $IC_{80}$  value, the number of pseudoviruses neutralized with an  $IC_{50} \leq 50\mu\text{g/mL}$ , and the median  $IC_{50}$  value (listed in order of importance). Additionally, the sequence and neutralization diversity of the set of variants to be characterized was considered. For example, although several variants (N(100f)Y, DU012-DU017) achieved good neutralization breadth and median potency, only N(100f)Y and DU017 were chosen for further characterization due to their good performance at the  $IC_{80}$  cutoff and their incorporation of two different mutations at the 100f position.

Based on the OSPREY designs of PGT145 we selected 10 variants to test in small-panel pseudovirus neutralization assays (See Table S5). These PGT145 variants were assayed for neutralization against a panel of 10 pseudovirus strains from clades A, B, and C (See Data S1). Variant DU303 (containing the N(100l)D mutation) achieved a significant increase in breadth against this small panel, neutralizing 7 of the 10 tested strains with both  $IC_{50}$  and  $IC_{80} \leq 50$



$\mu\text{g}/\text{mL}$ , while the wild-type controls neutralized only 4 strains (median) with  $\text{IC}_{50} \leq 50 \mu\text{g}/\text{mL}$  and only 3 strains (median) with  $\text{IC}_{80} \leq 50 \mu\text{g}/\text{mL}$ . The median  $\text{IC}_{50}$  ( $0.218 \mu\text{g}/\text{mL}$ ) over all neutralized pseudoviruses for DU303 was comparable to that for the wild-type controls, while the median  $\text{IC}_{80}$  ( $1.83 \mu\text{g}/\text{mL}$ ) was greater than that for the controls.

Based on the OSPREY PG9RSH design results we selected 34 variants to test in small-panel pseudovirus neutralization assays (See Table S6). These variants were assayed for neutralization against a panel of 10 pseudovirus strains from clades A, B, and C (See Data S1). Variant PG9RSH N(100f)Y (containing the N(100f)Y mutation) achieved a clear increase in potency against this small panel, achieving median  $\text{IC}_{50}$  values of 0.073 and  $0.185 \mu\text{g}/\text{mL}$  and median  $\text{IC}_{80}$  values of 0.821 and  $3.87 \mu\text{g}/\text{mL}$ . PG9RSH N(100f)Y also showed a slight increase in breadth as one of the few tested variants to achieve measurable neutralization against the 3873.v1.c24 pseudovirus (clade C). Similarly, variant DU025 (containing the Y(100k)D mutation) achieved an increase in potency against this small panel, with median  $\text{IC}_{50}$  ( $0.185 \mu\text{g}/\text{mL}$ ) and  $\text{IC}_{80}$  ( $2.21 \mu\text{g}/\text{mL}$ ) improving relative to the wild-type Ab controls.

Overall, the small-panel neutralization panels indicated that DU303 resulted in increased breadth, PG9RSH N(100f)Y resulted in improved potency with perhaps a slight increase in breadth, and DU025 resulted in improved potency. In summary, the small panels were used as a screening tool to select computationally designed antibodies for further analysis using a large panel. Antibodies with exceptional biological properties, typically neutralization potency or breadth as per the large panel, were subsequently selected for further characterization, including high resolution cryo-EM structures.

## SR3 Extended structural analysis of antibody variants

### SR3.1 Structural analysis of DU303

The EM structure of PGT145 variant DU303 reveals a binding mode consistent with previous structures of PGT145. We focus our detailed structural analysis around DU303 residue 100l. Applying different masking parameters to the image dataset resulted in two electron density maps with  $3.58 \text{ \AA}$  resolution that differ near residue 100l. The atomic model fit to the second density map shows the antibody interacting with the Env trimer apex through a long, negatively charged CDRH3 (Figure 2C).

D(100l) interacts with residues from two distinct gp120 subunits. Both electron density maps show well-resolved electron density for gp120 residues R166 and K169 (Figure S14). In contrast, density for residue D(100l) and for neighboring F(100d) is more ambiguous. Both maps show significant density between the modeled side-chain locations of D(100l) and F(100d). The first map localizes the density more closely to F(100d), a feature that suggests multiple occupied rotamers for F(100d) (Figure S14A). Density isosurfaces ( $1.2$  and  $3.0\sigma$ ) for residue D(100l) show little density associated with the modeled location of the side-chain carboxyl group, perhaps indicative of a mobile side-chain. The second map, in contrast, localizes the density more closely to residue D(100l) (Figure S14B). This does result in density localized to the modeled location of the side-chain carboxyl of D(100l), but the peak extends further toward the modeled locations of F(100d) and gp120 K169.

The atomic model of DU303 fit to the second density map indicates that D(100l) could form electrostatic interactions with gp120 residues R166 and K169 (Figure 3D). The side-chain nitrogen of K169 lies  $5.1 \text{ \AA}$  from a side-chain carboxyl oxygen of D(100l). Similarly, one of the side-chain nitrogens of R166 lies  $4.0 \text{ \AA}$  from a side-chain carboxyl oxygen of D(100l). The position of these side-chains suggests that the negatively charged D(100l) forms favorable interactions with positively charged residues on gp120 to improve breadth and potency of neutralization.

### SR3.2 Comparative analysis with DU303 design ensemble

To determine the extent to which design predictions corresponded with experimental structures we compared 10 members of the low-energy ensemble (LEE) generated during OSPREY design with the new structure of DU303 (Figure 3C,F). We aligned structures by the backbone heavy-atoms of the V2 region of a single gp120 subunit (Chain G, residues 154-177). Members of the LEE aligned to the Cryo-EM model with an RMSD of 0.79 Å calculated using 93 of 96 backbone heavy-atoms.

The CDRH3 loop in the experimental structure model is shifted laterally by 2.1 Å compared to the structures in the LEE, measured at the C<sub>α</sub> carbon of residue 100l. Despite this, the distances between the side-chains of D(100l), R166, and K169 are accurately predicted in the LEE. The closest side-chain nitrogen of K169 in the LEE lies 4.2 Å from a side-chain carboxyl oxygen of D(100l). Similarly, one of the side-chain nitrogens of R166 lies 5.0 Å from a side-chain carboxyl oxygen of D(100l). While the LEE predicts that D(100l) interacts more closely with K169 than R166 (a relationship that is inverted in the experimental structure model), these predicted interaction distances differ by at most one angstrom from those in the experimental model. The side-chain orientations of this system are qualitatively similar between the LEE and the experimental model, indicating that OSPREY correctly predicted the structural consequences of the N(100l)D substitution.

### SR3.3 Structural analysis of PG9RSH N(100f)Y

The EM structure of PG9RSH N(100f)Y shows the antibody interacting with the Env trimer apex through a hammer-like, negatively charged CDRH3 similar to previous bound structures of PG9RSH (Figure 2A). However, in contrast to a previous electron microscopy structure (PDB ID: 5VJ6)<sup>4</sup>, the CDRH3 loop appears in a twisted conformation (Figure SR2). We focus our detailed structural analysis around PG9RSH N(100f)Y residue 100f.

Y(100f) interacts with side-chains and glycans from two distinct gp120 subunits. Electron density maps show well-resolved density for gp120 residues D167, K168, and K169 (Figure S15A). The first two N-acetylglucosamine (GlcNAc) sugars of gp120 glycan N160 are also resolved. Density corresponding to bNAbs residues is more ambiguous. Both 1.2  $\sigma$  and 3.0  $\sigma$  isosurfaces show density peaks between the modeled side-chain locations of residues Y(100f) and Y(100a), perhaps suggesting the presence of alternate rotamer configurations. These isosurfaces do not contain the modeled locations of terminal hydroxyls for either tyrosine. Examination of low-density peaks (0.5  $\sigma$ ) reveals a small peak in density of the second GlcNAc of glycan N160 that is oriented toward the modeled location of Y(100f), suggesting possible interactions between Y(100f) and the glycan shield (Figure S15B).

The atomic model of PG9RSH N(100f)Y fit to the density map indicates that the primary interaction between Y(100f) and gp120 is a  $\pi$ -cation interaction with residue K168 (Figure 3A). The ammonium nitrogen of K168 lies 4.7 Å from the center of the Y(100f)  $\pi$  system, and the angle between the distance vector and the ring normal vector is approximately 20°, which is representative of typical  $\pi$ -cation geometry<sup>5</sup>. Y(100f) also forms van der Waals interactions with antibody residues P99, Y(100a), and TYS(100h). The side-chain geometry suggests that the aromatic Y(100f) side-chain participates in a  $\pi$ -cation interaction with the positively charged K168 to improve breadth and potency of neutralization.

### SR3.4 Comparative analysis with PG9RSH N(100f)Y design ensemble

To determine the extent to which design predictions corresponded with experimental structures we compared 10 members of the low-energy ensemble (LEE) generated during OSPREY design

with the new structure of PG9RSH N(100f)Y (Figure 3A, D). We aligned structures by the backbone heavy-atoms of the V2 region of a single gp120 subunit (Chain I, residues 154-177). Members of the LEE aligned to the Cryo-EM model with an RMSD of 0.54 Å calculated using 92 of 96 backbone heavy-atoms.

The CDRH3 loops for the LEE structures and the experimental model near residue 100f are nearly identical in backbone conformation, despite the global difference between the twisted and untwisted conformations. The V2 loop of one gp120 subunit (chain G) exhibits a slight lateral shift relative to the experimental model. The side-chain locations in the LEE are qualitatively similar to those in the experimental model. The ammonium nitrogen lies as close as 5.1 Å from the center of the Y(100f)  $\pi$  system. Interestingly, multiple rotamers of Y(100f) and Y(100a) appear in the LEE, resulting in a conformation in which these side-chains have rotated and stacked. While for the majority of the LEE Y(100f) presents the face of the  $\pi$  ring toward K168, for a few members K168 forms van der Waals interactions with the edge of the aromatic ring. Notably, the design ensemble indicates D167 may interact with Y(100f), but these predicted interactions are not supported by the experimental model. However, the overall correspondence between LEE and experimental model suggests that OSPREY correctly predicted the structural consequences of the N(100f)Y substitution.

### SR3.5 Structural analysis of DU025

The EM structure of PG9RSH variant DU025 shows the antibody interacting with the Env trimer apex through a hammer-like, negatively charged CDRH3 similar to previous bound structures of PG9RSH (Figure 2A). However, in contrast to a previous electron microscopy structure (PDB ID: 5VJ6)<sup>4</sup>, the CDRH3 loop appears in a twisted conformation (Figure SR2).

We focus our detailed structural analysis around DU025 residue 100k. The electron density around the side chain of D(100k) is well-resolved at  $1.2\sigma$  and maintains a small but noticeable peak at  $3.0\sigma$  (Figure S16A). Similarly, clear density is observed at both  $1.2$  and  $3.0\sigma$  for the side-chains of Env residues Q170, K305, and Y173, along with the first two core GlcNAc monomers of glycan N156. Nearly the entire core of glycan N156 is resolved at  $1.2\sigma$ . Interestingly, three unassigned density peaks arise in the groove between the V2 and V3 loops at both  $1.2$  and  $3.0\sigma$ , which could indicate the presence of solvent at this interface (Figure S16B). Furthermore, a bridge of density at  $1.0\sigma$  arises between the modeled locations of Env residues Q170 and R308, hinting at long-range or solvent-mediated interactions between the two. Multiple strong density peaks around the modeled side-chain location of R308 provide evidence for multiple side-chain conformations at this residue.

These data suggest that residue D(100k) may form long-range or solvent-mediated interactions with residues Q170 and K305, which lie at distances of 4.1, and 6.8 Å, respectively. Additionally, D(100k) may interact with residue Y173 and glycan N156. The multiple unsatisfied densities at both low and high  $\sigma$  suggest that solvent may play a critical role at this interface.

### SR3.6 Comparative analysis with DU025 design ensemble

To determine the extent to which design predictions corresponded with experimental structures we compared 10 members of the low-energy ensemble (LEE) generated during OSPREY design with the new structure of DU025 (Figure 3B, E). We aligned structures by the backbone heavy-atoms of the V2 region of a single gp120 subunit (Chain I, residues 154-177). Members of the LEE aligned to the Cryo-EM model with an RMSD of 0.50 Å calculated using 90 of 96 backbone heavy-atoms.

Members of the LEE indicate that improvement in binding is predicted to result from favorable electrostatic interactions between D(100k) and Q170 or R308. The lowest-energy member of the design ensemble places one carboxyl oxygen of D(100k) 3.2 Å from the side chain nitrogen of Q170 and 5.6 Å from R308. K305, on the other hand, lies distal (9 Å) from D(100k).

The design ensemble (based on PDB: 5VJ6) displays the CDRH3 loop in the untwisted conformation, whereas the cryo-EM structure of DU025 exhibits a twisted CDRH3 loop. Although this does not cause large changes for most PG9RSH residues that contact Env directly, residues 100i-100n are displaced by up to 3.6 Å measured at the C<sub>α</sub>. Residue D(100k) in particular is displaced by 3.5 Å, resulting in a significant change in its environment. As a result, although the design ensemble correctly predicts that D(100k) creates long-range electrostatic interactions, and correctly predicts a favorable interaction with Q170, the predicted interaction between D(100k) and R308 is not supported by the cryo-EM structure. Instead, shifts in the backbone create interactions between D(100k) and K305. However, the overall quality and type of interactions formed by D(100k) in the design ensemble is in fact consistent with the experimental structure.

### SR3.7 Inconsistent CDRH3 loop conformation in design inputs of PG9

Interestingly, we noticed differences between the CDRH3 conformations of PG9 of our design input model (based on PDB ID: 5VJ6) and the experimentally determined structures of both PG9RSH N(100f)Y and DU025. Cryo-EM structures placed the PG9RSH CDRH3 loop in a twisted conformation, similar to the conformations displayed in previous structures (PDB IDs: 3MME, 3U2S, 3U4E, 4YAQ), but the model represented by 5VJ6 displays an “untwisted” conformation (Figure SR2). The consensus between all but one structure suggests that the twisted conformation is in fact the correct CDRH3 conformation. The aberrant structure, 5VJ6, was generated by fitting crystal structures of PG9 bound to a V1V2 scaffold (PDB ID: 3U4E) and unliganded gp120 core (PDB ID: 3DNN) to density obtained via electron microscopy<sup>6</sup>, but surprisingly the loop conformations in 5VJ6 and 3U4E are different. This suggests that fitting or processing of 5VJ6 inappropriately modified the CDRH3 loop, resulting in a hallucinated conformation.

## SR4 Comparison to putative germline antibodies

The mutation defining PGT145 DU303, N(100)D, does not appear in the putative germline antibody (<sup>7</sup> via IMGT/V-QUEST<sup>8</sup>) nor the clonally-related PGT141-PGT144 sequences<sup>9</sup>. As such, this mutation appears to represent a higher bar for elicitation by vaccines, albeit by only one mutation. It is important to note that, due to the long CDRH3 insertion, the CDRH3 sequence of the putative germline antibody was taken from the mature PGT145 antibody when the D gene did not provide sufficient coverage<sup>7</sup>.

Similarly, the mutations PG9RSH N(100f)Y and PG9RSH DU025 (Y(100k)D) do not appear in the putative germline antibodies for PG9 (<sup>7</sup> via IMGT/V-QUEST<sup>8</sup>) nor the somatically-related PG16<sup>10</sup>. Nor do either of these mutations appear in the mature PG16 antibody. These observations suggest that, like DU303, these mutations represent a higher bar for elicitation. However, position 100k does appear contain a mutation away from germline in both PG9 and PG16, suggesting that, at least for DU025, the bar for vaccine elicitation is no higher than for the wild-type PG9 antibody, ignoring the RSH chimeric context.

## SR5 Investigation of additional Env genotypes

We are interested in additional questions and extensions to this work, but unfortunately many of these are beyond the scope of the current manuscript. Can this method be applied to *any* antigen genotype to successfully improve breadth? We suspect that the answer is no. We have in fact been careful to avoid claims that improved breadth can result from design against *any* antigen in this manuscript. How, then, can we differentiate between antigens that are more “canonical” (i.e., antigens for which design for potency can result in breadth), versus those that are less? In the discussion section of this manuscript we provide several hypotheses for how one could begin to address this question, but we leave the evaluation of these hypotheses for future work. Designs on additional genotypes could provide information to help answer these questions, although structural information for these antibodies complexed with other Env genotypes is sparse. The results of such designs would not themselves be definitive, and design results would need to be characterized experimentally.

Nonetheless, to satisfy our curiosity we additionally performed OSPREY designs on PGT145 in complex with the AMC011 (PDB ID: 6NIJ) and SIVmac239 (PDB ID: 8DVD) Env trimers, focusing on CDRH3 residues 100d and 100l. The primary differences between these trimers and the BG505 trimer at this site lie at Env residue 169, which is a lysine, valine, or threonine for the BG505, AMC011, and SIVmac239 trimers, respectively. We used the unminimized input PDB structures (after adding hydrogens using MolProbity) as the input structure, with flexible and mutable residues described in Table SR6, and approximated the top 20 sequences by  $K^*$  score (and wild-type sequence) for each model.

The results of these designs can be found in the Supplementary Information (Table SR7 and SR8, Figure SR3 and SR4). Overall, we do see sequences with high  $K^*$  scores within the top 20 sequences of both designs that appear similar to those in the original BG505 design, especially when focusing on the mutations at position 100d. Differences can be seen with respect to position 100l, which is expected given the sequence variation at residue 169. Similarly to the BG505 designs, both the 6NIJ and 8DVD designs assign high  $K^*$  scores to sequences with either the N(100l)D or N(100l)E mutations, and, like the BG505 design, the AMC011 design assigns a high  $K^*$  score to the F(100d) D(100l) sequence. However, the low antibody partition function  $Z_{Ab}$  and low complex partition function for the PGT145-F(100d)D(100l):AMC011 sequence indicates that this is not a viable mutation for binding to the AMC011 Env trimer.

Most substitutions of N(100l) with a negatively charged residue result in a decrease in the unbound antibody partition function  $Z_{Ab}$  to some extent, indicating that the additional negative charge may decrease the antibody CDRH3 stability. However, examining the complex and antibody partition functions for these sequences reveals a critical difference: The complex partition function for the BG505:PGT145-D100l complex remains approximately equal to that for the BG505:PGT145, but the complex partition function for the AMC011:PGT145-D100l complex is significantly lower than that for the AMC011:PGT145 complex. Thus, our models predict that the the negatively charged D(100l) is compensated for in the BG505 complex state by interaction with K169, but not in the AMC011 complex state, where no productive interactions are formed with V169. The high  $K^*$  score of F(100d)-D(100l) in the AMC011 design is a case of a bad complex partition function divided by a worse unbound partition function – a phenomenon that we select against using the unbound partition function stability cutoffs. As a result, we would not have chosen to test the N(100l)D mutation from this design, but would have identified position 100l as a site of interest.

Overall, these additional designs suggest that OSPREY is correctly modeling the environment at this site. Similar mutations were found by OSPREY ranked by  $K^*$  score alone, but there were significant differences in results after filtering by stability. It is impossible to assess the effects

of many of these mutations (e.g., Y(100d)W, N(100l)M) without experimental characterization, but these results provide a direction for possible future work.

## SR6 Structure modeling of additional Env genotypes

To gain further insight into the mechanisms of improved breadth for these variant antibodies we constructed homology models of each antibody in complex with Env trimers from other strains of HIV or SIV. We first leveraged existing structures of PGT145 in complex with the AMC011 (PDB ID: 6NIJ) and SIVmac239 (PDB ID: 8DVD) trimers to construct conservative homology models. Unfortunately, to our knowledge there are still no structures of PG9 in complex with Env trimers from strains other than BG505. The primary difference between AMC011 or SIVmac239 trimers and the BG505 trimer near residue 100l is the identity of Env residue 169, which is a lysine, valine, or threonine in BG505, AMC011, and SIVmac239, respectively. We used the unminimized input PDB structures (after adding hydrogens using MolProbity) as the input structure, with flexible and mutable residues described in Table SR6. We used OSPREY to mutate PGT145 residue N(100l) to aspartate in both structures and generated ensembles of predicted low energy conformations in the same manner as described in the methods section of the manuscript. We then compared the resulting ensembles to the Cryo-EM structure of DU303 to model the effect of Env sequence and structural variation on DU303.

Broad structural features match well between the models of DU303 bound to AMC011 or SIVmac239 and the DU303:BG505 experimental structure, but small differences in loop conformations are evident (See Figure SR5) We aligned structures by the 23  $C_\alpha$  atoms of the CDRH3 loops, which aligned to the cryo-EM structure of DU303:BG505 with an RMSD of 1.62 Å or 0.86 Å for the models of DU303:AMC011 or DU303:SIVmac239, respectively. Slight differences are evident in the CDRH3 loop of DU303:AMC011 relative to DU303:BG505, which significantly change the orientation of the  $C_\alpha$ - $C_\beta$  vector of residue 100l relative to the DU303:BG505 structure. The CDRH3 loop of DU303:SIVmac239 appears quite similar to that of DU303:BG505. The V2 loops in both models are roughly consistent with those in the experimental structure, but shifts of up to 3 Å or 7 Å relative to the BG505 V2 conformations can be seen. These differences could reflect real conformational differences, conformational heterogeneity, model fitting error, or experimental uncertainty.

The intermolecular interactions of residue D(100l) in both models are significantly reduced relative to the experimental structure. Not only is V169 too short to interact with the relatively distant D(100l) in the DU303:AMC011 model, but the reorientation of residue 100l due to CDRH3 conformation differences seems to preclude positive interactions with V169. Additionally, this reorientation increases the distance between residue 100l and R166, and, as a result, the model predicts no significant interactions between these residues. T169 is also too short to interact with D(100l) in the DU303:SIVmac239 model. R166 appears to interact primarily with the sulfated tyrosine at residue 100f, possibly due to shifts in the V2 loop position relative to the DU303 experimental structure. Overall, these models suggest that DU303 would not gain neutralization potency for the AMC011 HIV strain and for the SIVmac239 SIV strain due to lack of interaction with the important K169 residue. Similar observations were also previously gleaned from the analysis of large-panel neutralization data (See Figure S10).

Due to the lack of experimental structure information for PG9 binding to Env trimers other than BG505, to model the interactions of P9RSH N(100f)Y and DU025 we also pursued less conservative modeling approaches. We used AlphaFold Multimer<sup>11,12</sup> to predict structures of PG9RSH N(100f)Y in complex with Envs from strains ZM233.6, and JRFL.JB, and predicted structures of DU025 in complex with JRFL.JB and TRO.11. Additionally, we predicted struc-

tures of all antibodies in complex with BG505.W6M.C2 as a positive control. We examined 25 predicted structures for each complex. In general, although the antibody and Env structures individually showed good homology to existing structures, the antibody binding epitope was poorly predicted. Only a few predicted structures placed antibodies near the Env apex (Figure SR6), and no structures successfully recapitulated the parallel  $\beta$ -strand interaction between PG9RSH and the Env V2 loop. Interestingly, no predicted structures for the BG505 control placed these antibodies near the apex of the Env trimer.

Overall, our modeling yielded good results when based on conservative modification of existing experimental structures, but was less successful when such structures were unavailable. Due to the scarcity of experimental structure data, the difficulty of modeling protein loops, and the difficulty of accurately predicting binding interfaces, further modeling of the interactions between these variant antibodies and diverse Env trimers is deferred to future work.

## References

- [1] Jeong Hyun Lee et al. “A Broadly Neutralizing Antibody Targets the Dynamic HIV Envelope Trimer Apex via a Long, Rigidified, and Anionic  $\beta$ -Hairpin Structure”. In: *Immunity* 46.4 (Apr. 2017), pp. 690–702. ISSN: 10974180. DOI: [10.1016/j.immuni.2017.03.017](https://doi.org/10.1016/j.immuni.2017.03.017). URL: <https://pubmed.ncbi.nlm.nih.gov/28423342/>.
- [2] Mark A. Hallen et al. “OSPREY 3.0: Open-Source Protein Redesign for You, with Powerful New Features”. In: *J. Comput. Chem.* 9999 (2018), pp. 1–14. DOI: [10.1002/jcc.25522](https://doi.org/10.1002/jcc.25522). URL: <https://www.biorxiv.org/content/early/2018/04/23/306324>.
- [3] Anna Ulrika Lowegard. “Novel Algorithms and Tools for Computational Protein Design with Applications to Drug Resistance Prediction, Antibody Design, Peptide Inhibitor Design, and Protein Stability Prediction”. PhD thesis. Duke University, 2022.
- [4] Haoqing Wang et al. “Asymmetric recognition of HIV-1 Envelope trimer by V1V2 loop-targeting antibodies”. In: *eLife* 6 (2017).
- [5] Hervé Minoux and Christophe Chipot. “Cation- $\pi$  interactions in proteins: Can simple models provide an accurate description?” In: *Journal of the American Chemical Society* 121.44 (Nov. 1999), pp. 10366–10372. ISSN: 00027863. DOI: [10.1021/ja990914p](https://doi.org/10.1021/ja990914p). URL: <http://www.sander.embl-heidelberg.de/>.
- [6] Jean Philippe Julien et al. “Asymmetric recognition of the HIV-1 trimer by broadly neutralizing antibody PG9”. In: *Proceedings of the National Academy of Sciences of the United States of America* 110.11 (Mar. 2013), pp. 4351–4356. ISSN: 00278424. DOI: [10.1073/pnas.1217537110](https://doi.org/10.1073/pnas.1217537110). URL: <https://www.pnas.org/content/110/11/4351%20https://www.pnas.org/content/110/11/4351.abstract>.
- [7] Kwinten Sliepen et al. “Binding of inferred germline precursors of broadly neutralizing HIV-1 antibodies to native-like envelope trimers”. In: *Virology* 486 (Dec. 2015), pp. 116–120. DOI: [10.1016/j.virol.2015.08.002](https://doi.org/10.1016/j.virol.2015.08.002). URL: <https://doi.org/10.1016%2Fj.virol.2015.08.002>.
- [8] Véronique Giudicelli, Xavier Brochet, and Marie-Paule Lefranc. “IMGT/V-QUEST: IMGT Standardized Analysis of the Immunoglobulin (IG) and T Cell Receptor (TR) Nucleotide Sequences”. In: *Cold Spring Harb Protoc* 2011.6 (June 2011), pdb.prot5633. DOI: [10.1101/pdb.prot5633](https://doi.org/10.1101/pdb.prot5633). URL: <https://doi.org/10.1101%2Fpdb.prot5633>.
- [9] Laura M. Walker et al. “Broad neutralization coverage of HIV by multiple highly potent antibodies”. In: *Nature* 477.7365 (Sept. 2011), pp. 466–470. ISSN: 00280836. DOI: [10.1038/nature10373](https://doi.org/10.1038/nature10373). URL: <https://www.nature.com/articles/nature10373>.

- [10] Marie Pancera et al. “Crystal Structure of PG16 and Chimeric Dissection with Somatically Related PG9: Structure-Function Analysis of Two Quaternary-Specific Antibodies That Effectively Neutralize HIV-1”. In: *Journal of Virology* 84.16 (Aug. 2010), pp. 8098–8110. ISSN: 0022-538X. DOI: [10.1128/jvi.00966-10](https://doi.org/10.1128/jvi.00966-10). URL: <http://jvi.asm.org/>.
- [11] John Jumper et al. “Highly accurate protein structure prediction with AlphaFold”. In: *Nature* 596.7873 (Aug. 2021), pp. 583–589. ISSN: 14764687. DOI: [10.1038/s41586-021-03819-2](https://doi.org/10.1038/s41586-021-03819-2). URL: <https://doi.org/10.1038/s41586-021-03819-2>.
- [12] Richard Evans et al. “Protein complex prediction with AlphaFold-Multimer”. In: *bioRxiv* (Mar. 2022), p. 2021.10.04.463034. DOI: [10.1101/2021.10.04.463034](https://doi.org/10.1101/2021.10.04.463034). URL: <https://doi.org/10.1101/2021.10.04.463034>.
